# Supplementary material for: Serum concentrations of anti-Müllerian hormone modulate ovarian response to different doses of follicle-stimulating hormone in Japanese Black donors
Source: PubMed Central journal article supplement — J Reprod Dev. 2024 Nov 10;70(6):418–22. doi: 10.1262/jrd.2024-067 (PMC11658917; doi:10.1262/jrd.2024-067), 2024-11-10
Supplement: jrd-70-418-s001.pdf [file jrd-70-418-s001.pdf]

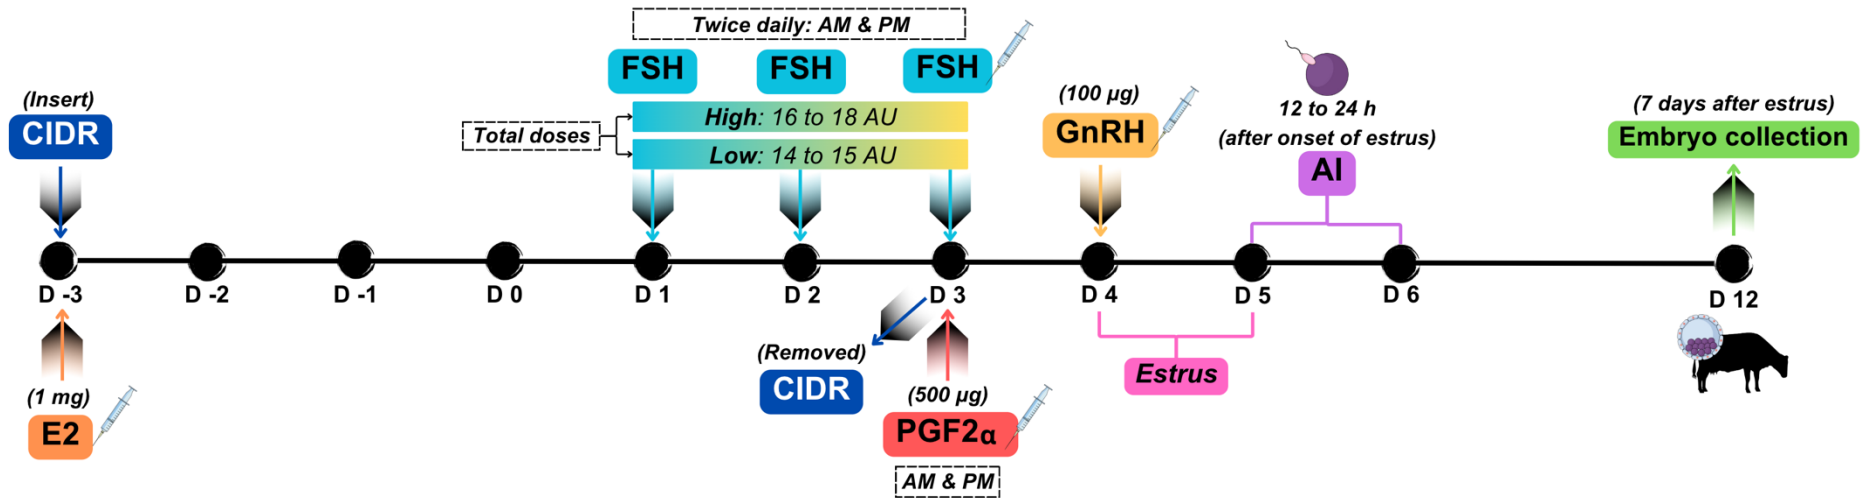

**Supplementary Fig. 1. Schematic diagram of the protocol for the superovulation program**

Note: *AM & PM* indicate that the injection was administered twice daily, in the morning and evening. Abbreviations: CIDR, controlled internal drug release; E2, estradiol; FSH, follicle-stimulating hormone; GnRH, gonadotropin-releasing hormone; PGF<sub>2α</sub>, prostaglandin F<sub>2α</sub>; AI, artificial insemination; IU, international unit; mg, milligram; μg, microgram; D, day.
